# Supplementary material for: Insights of Platinum Drug Interaction with Spinel Magnetic Nanocomposites for Targeted Anti-Cancer Effect
Source: MDPI journal article supplement (doi:10.3390/cancers15030695), 2023-01-23
Supplement: s1 [file s1]

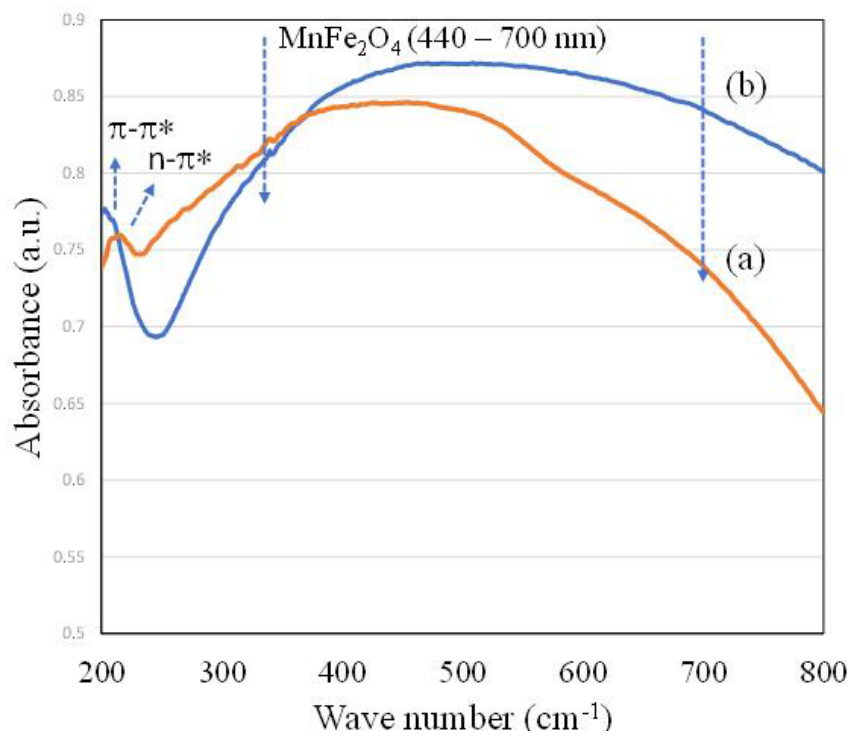

**Figure S1.** Diffuse reflectance UV-Visible spectra of (a) MnFe<sub>2</sub>O<sub>4</sub>/Silica and (b) MnFe<sub>2</sub>O<sub>4</sub>/GO.

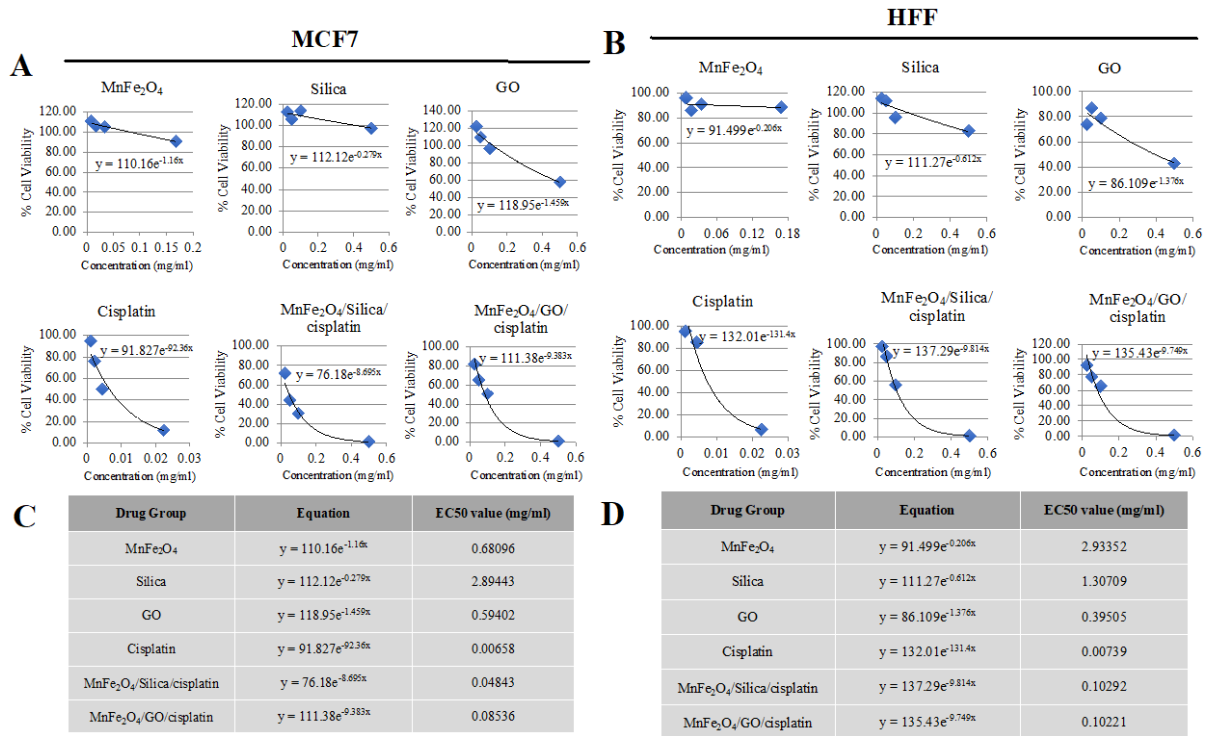

**Figure S2: EC50 analysis.** (A, B) Data from Fig. 8 were used to extrapolate the line equation of: MnFe<sub>2</sub>O<sub>4</sub>, silica, GO, cisplatin, MnFe<sub>2</sub>O<sub>4</sub>/silica/cisplatin, and MnFe<sub>2</sub>O<sub>4</sub>/GO/cisplatin. (A) represents data from MCF7, and (B) HFF cell lines. Line equations were used to calculate the EC50 for each nanocomposite tested on MCF7 (C) and HFF (D) cell lines.

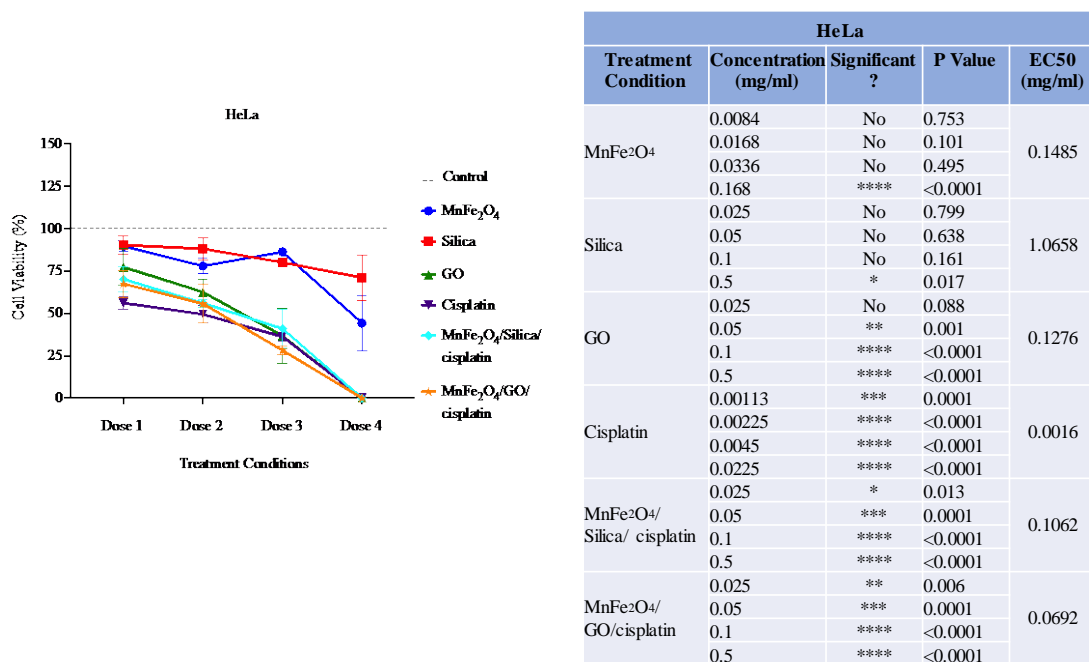

**Figure S3:** (A) MTT cell viability assay on HeLa cell line. Cells were treated with the following conditions for 48h:  $\text{MnFe}_2\text{O}_4$ , silica, GO, cisplatin,  $\text{MnFe}_2\text{O}_4/\text{silica}/\text{cisplatin}$  and  $\text{MnFe}_2\text{O}_4/\text{GO}/\text{cisplatin}$ . (B) Treatment concentrations and statistical analysis. Different concentrations were used for  $\text{MnFe}_2\text{O}_4$  and cisplatin to reflect the actual concentration adsorbed on the nanocomposite. For details, please see the Materials and Methods section.  $n=3$  independent experiments. Dashed line represents untreated cells, control. \*  $p<0.05$ ; \*\*  $p<0.01$ ; \*\*\*  $p<0.001$ ; \*\*\*\*  $p<0.0001$  versus control using two-way ANOVA with Dunnett's *post hoc* testing.

(A)

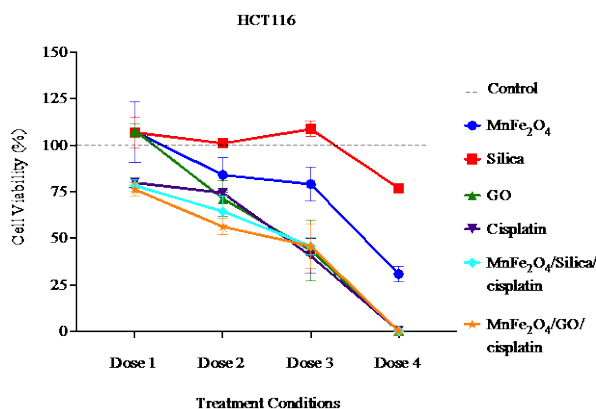

(B)

| HCT116                                             |                       |               |         |              |
|----------------------------------------------------|-----------------------|---------------|---------|--------------|
| Treatment Condition                                | Concentration (mg/ml) | Significant ? | P Value | EC50 (mg/ml) |
| MnFe <sub>2</sub> O <sub>4</sub>                   | 0.0084                | No            | 0.932   | 0.1181       |
|                                                    | 0.0168                | No            | 0.336   |              |
|                                                    | 0.0336                | No            | 0.124   |              |
|                                                    | 0.168                 | ****          | <0.0001 |              |
| Silica                                             | 0.025                 | No            | 0.946   | 0.9440       |
|                                                    | 0.05                  | No            | 1       |              |
|                                                    | 0.1                   | No            | 0.855   |              |
|                                                    | 0.5                   | No            | 0.076   |              |
| GO                                                 | 0.025                 | No            | 0.902   | 0.2009       |
|                                                    | 0.05                  | *             | 0.017   |              |
|                                                    | 0.1                   | ****          | <0.0001 |              |
|                                                    | 0.5                   | ****          | <0.0001 |              |
| Cisplatin                                          | 0.00113               | No            | 0.148   | 0.0072       |
|                                                    | 0.00225               | *             | 0.039   |              |
|                                                    | 0.0045                | ****          | <0.0001 |              |
|                                                    | 0.0225                | ****          | <0.0001 |              |
| MnFe <sub>2</sub> O <sub>4</sub> /Silica/cisplatin | 0.025                 | No            | 0.101   | 0.1492       |
|                                                    | 0.05                  | **            | 0.002   |              |
|                                                    | 0.1                   | ****          | <0.0001 |              |
|                                                    | 0.5                   | ****          | <0.0001 |              |
| MnFe <sub>2</sub> O <sub>4</sub> /GO/cisplatin     | 0.025                 | No            | 0.062   | 0.1295       |
|                                                    | 0.05                  | ***           | 0.0001  |              |
|                                                    | 0.1                   | ****          | <0.0001 |              |
|                                                    | 0.5                   | ****          | <0.0001 |              |

Figure S4: (A) MTT cell viability assay on HCT116 cell line. Cells were treated with the following conditions for 48h: MnFe<sub>2</sub>O<sub>4</sub>, silica, GO, Cisplatin, MnFe<sub>2</sub>O<sub>4</sub>/silica/cisplatin and MnFe<sub>2</sub>O<sub>4</sub>/GO/cisplatin. (B) Treatment concentrations and statistical analysis. Different concentrations were used for MnFe<sub>2</sub>O<sub>4</sub> and cisplatin to reflect the actual concentration adsorbed on the nanocomposite. For details, please see the Materials and Methods section. n= 3 independent experiments. Dashed line represents untreated cells, control. \* p<0.05; \*\* p<0.01; \*\*\* p<0.001; \*\*\*\* p<0.0001 versus control using two-way ANOVA with Dunnett's post hoc testing.

(A)

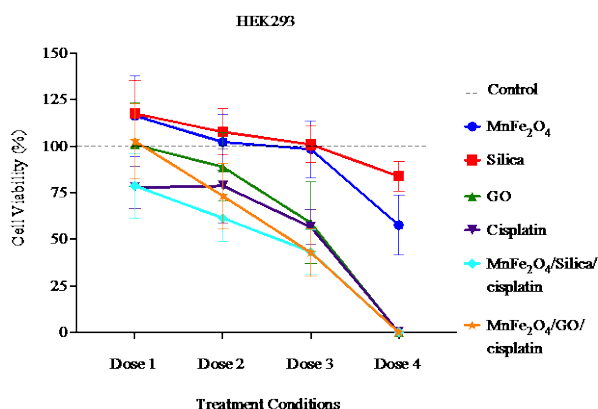

(B)

| HEK293                                             |                       |               |         |              |
|----------------------------------------------------|-----------------------|---------------|---------|--------------|
| Treatment Condition                                | Concentration (mg/ml) | Significant ? | P Value | EC50 (mg/ml) |
| MnFe <sub>2</sub> O <sub>4</sub>                   | 0.0084                | No            | 0.512   | 0.1889       |
|                                                    | 0.0168                | No            | 0.9997  |              |
|                                                    | 0.0336                | No            | 0.9998  |              |
|                                                    | 0.168                 | **            | 0.0025  |              |
| Silica                                             | 0.025                 | No            | 0.4426  | 1.0553       |
|                                                    | 0.05                  | No            | 0.9607  |              |
|                                                    | 0.1                   | No            | 0.9999  |              |
|                                                    | 0.5                   | No            | 0.5217  |              |
| GO                                                 | 0.025                 | No            | 0.9999  | 0.2311       |
|                                                    | 0.05                  | No            | 0.8276  |              |
|                                                    | 0.1                   | **            | 0.0035  |              |
|                                                    | 0.5                   | ****          | <0.0001 |              |
| Cisplatin                                          | 0.00113               | No            | 0.2156  | 0.0085       |
|                                                    | 0.00225               | No            | 0.2532  |              |
|                                                    | 0.0045                | **            | 0.0019  |              |
|                                                    | 0.0225                | ****          | <0.0001 |              |
| MnFe <sub>2</sub> O <sub>4</sub> /Silica/cisplatin | 0.025                 | No            | 0.2524  | 0.1398       |
|                                                    | 0.05                  | **            | 0.0068  |              |
|                                                    | 0.1                   | ****          | <0.0001 |              |
|                                                    | 0.5                   | ****          | <0.0001 |              |
| MnFe <sub>2</sub> O <sub>4</sub> /GO/cisplatin     | 0.025                 | No            | 0.9996  | 0.1954       |
|                                                    | 0.05                  | No            | 0.0966  |              |
|                                                    | 0.1                   | ****          | <0.0001 |              |
|                                                    | 0.5                   | ****          | <0.0001 |              |

Figure S5: (A) MTT cell viability assay on HEK293 cell line. Cells were treated with the following conditions for 48h: MnFe<sub>2</sub>O<sub>4</sub>, silica, GO, Cisplatin, MnFe<sub>2</sub>O<sub>4</sub>/silica/cisplatin and MnFe<sub>2</sub>O<sub>4</sub>/GO/cisplatin. (B) Treatment concentrations and statistical analysis. Different concentrations were used for MnFe<sub>2</sub>O<sub>4</sub> and cisplatin to reflect the actual concentration adsorbed on the nanocomposite. For details, please see the Materials and Methods section. n= 3 independent experiments. Dashed line represents untreated cells, control. \* p<0.05; \*\* p<0.01; \*\*\* p<0.001; \*\*\*\* p<0.0001 versus control using two-way ANOVA with Dunnett's post hoc testing.

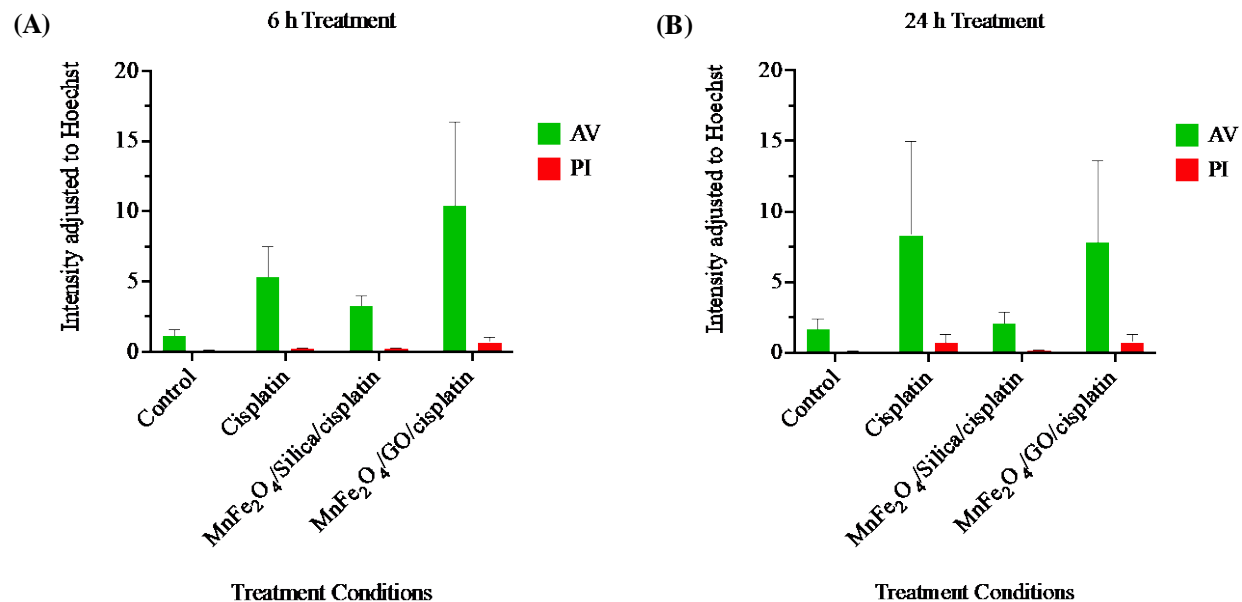

**Figure S6:** HCT116 cells were treated with 0.05 mg/ml of MnFe<sub>2</sub>O<sub>4</sub>/silica/cisplatin and MnFe<sub>2</sub>O<sub>4</sub>/GO/cisplatin and its equivalent concentration of cisplatin (0.00225 mg/ml for details, please check the Materials and Methods section). Cells were treated for 6 h (**A**), and 24 h (**B**) and then stained with Annexin V (AV), Propidium Iodide (PI), and Hoechst. n= 5 independent experiments.
